The authors are grateful to Dr. W. C. Holland for advice in preparation of this manuscript and to Dr. Norman Martin for assistance in interpreting the electronystagmograms.

### References

1. De Castro, J., and Mundeleeer, P.: Die Neurolept-analgesie, Auswahl der Präparate, Bedeutung der Analgesie und der Neuroleptie, *Der Anaesthetist* 11: 10, 1962.
2. Janssen, P. A. J.: Vergleichende pharmakologische Daten über sechs neue basische 4' fluoro-butero-phenone-derivative, *Arzneimittel-Forsch.* 11: 819, 1961.
3. Dowdy, E. G., Goksen, N., Arnold, G. E., Moore, W. T., and Fabian, L. W.: A new treatment of Meniere's disease, *Arch. Otolaryng.* 82: 494, 1965.
4. Fitzgerald, G., and Hallpike, C. S.: Observations on the directional preponderance of caloric nystagmus resulting from unilateral labyrinthectomy, *Brain* 65: 115, 1942.
5. Aschan, G., Bergstedt, M., and Stahle, J.: Nystagmography: Recording of nystagmus in clinical neuro-otological examinations, *Acta Oto-Laryng. Suppl.* 129: 1, 1956.
6. Jongkees, L. B. W., and Philipszoon, A. J.: Electronystagmography: The caloric test, *Acta Oto-Laryng. Suppl.* 189: 45, 1964.
7. Holderness, M. C., Chase, P. E., and Dripps, R. D.: A narcotic analgesic and a butyrophenone with nitrous oxide for general anesthesia, *ANESTHESIOLOGY* 24: 336, 1963.
8. Corssen, G., Domino, E. F., and Sweet, R. B.: Neurolept-Analgesia and Anesthesia: Pharmacologic and clinical considerations, *Anesth. Analg.* 43: 744, 1964.
9. Dobkin, A. B., Israel, J. S., and Byles, P. H.: Innovar-N<sub>2</sub>O anaesthesia in normal men: Effect on respiration, circulatory dynamics, liver function, metabolic functions, acid-base balance, and psychic response, *Canad. Anaesth. Soc. J.* 11: 41, 1964.
10. Fischer, J. J.: *The Labyrinth-Physiology and Functional Test.* New York, Grune and Stratton, 1956, p. 59.
11. Marx, H.: Über den galvanischen nystagmus, *Z. Ohrenh. Wiesbaden* 63: 201, 1911.
12. Jonkees, L. B. W., and Philipszoon, A. J.: Electronystagmography: The galvanic test, *Acta Oto-Laryng. Suppl.* 189: 92, 1964.

### Obstetrical Anesthesia

**EARLY VS. LATE CORD CLAMPING** The effects of early and late clamping of the umbilical cord on postpartum bleeding, duration of the third stage of labor, and the incidence of placental retention were studied in 117 mothers. Postpartum bleeding and retained placentae occurred with significantly greater frequency in mothers of infants whose umbilical cords were clamped early. These findings were not related to over-distention of the uterus, medications, or soft-tissue injury. No differences were found in the third stage of labor. (*Walsh, S. Z.: Maternal Effects of Early and Late Clamping of the Umbilical Cord, Lancet* 1: 996 (May) 1968.)

**FETAL DEPRESSION** Simultaneous monitoring of maternal and fetal EEG in the guinea pig allows one to study placental drug transfer. EEG changes in the fetus appeared within 60 sec of the appearance of similar changes in the maternal EEG following maternal intravenous, intramuscular or intraperitoneal injection of meperidine. Following fetal intramuscular or intraperitoneal injection, rapid transfer to the maternal brain was also documented. This study has special interest because it demonstrates that meperidine, administered to a pregnant patient, has fetal as well as neonatal depressant effects. (*Rosen, M. G., and Bleyer, W. A.: Bidirectional Transfer of Meperidine Across the Guinea Pig Placenta, Amer. J. Obstet. Gynec.* 101: 918 (Aug.) 1968.)
